# Supplementary material for: Efficient Cytotoxicity of Recombinant Azurin in Escherichia coli Nissle 1917-Derived Minicells against Colon Cancer Cells
Source: MDPI journal article supplement (doi:10.3390/bioengineering10101188), 2023-10-13
Supplement: s1 [file s1]

## Supplementary information

### I. Primers

MinCD-R1:

TTTCTTCCGCGAGAGAGAAAGAAATCGAGTAATGCCATAACTCTCCTTCTTAAAGTTAAACAAA  
TTAGAAAAAATCATCGAGCATC

MinCD-F1:

AGGATGTCAAACACGCCAATCGAGCTTAAAGGCAGTAGCTTCACTTTATATGAGCCATATT  
CAACGGGAA

CT26-F(GAPDH):

GGTCCCAGCTTAGGTTCAT

CT26-R(GAPDH):

CCCAATACGGCCAAATCCGT

HT29-F(GAPDH):

GGTGACTAACCCTGCGCTC

HT29-R(GAPDH):

CCCAATACGACCAAATCAGAGAAT

CT26-F(p53):

TCCGAAGACTGGATGACTGC

CT26-R(p53):

GATCGTCCATGCAGTGAGGT

HT29-F(p53):

CTTCCCTGGATTGGCAGC

HT29-R(p53) :

TTTCAGGAAGTAGTTTCCATAGGT

### II. Sequences

MinE(blue color), RBS(red color), KANA(green color), MinC(black color)

TTATTTTCAGCTCTTCTGCTTCCGGTAAGGTCACGTTTCAGCTCAAGAATAGAAATATCGCCAT  
CTTTTTGCTCAAGCTGTACGGTTACCATCTCAGGATCAATTTGTACATATTTACAAATGACCTCA  
AGAATATCTTTACGCAACTGCGGCAGATAATGCGGTTCTGCATCGCTGCGACGGCGTTTCAGCAA  
CAATAATCTGCAACCGTTCTTTTGCAATGTTGGCTGTGTTTTCTTCCGCGAGAGAGAAAGAAATCG  
AGTAATGCCATAACtctcctttaagttaacaaattagaaaaactcatcgagcatcaaatgaaactgcaatttattcatatcaggattatcaatacc  
atatTTTTgaaaaagccgtttctgtaatgaaggagaaaaactcaccgaggcagttccataggatggcaagatcctggatcggctcgcattccgactcgtccaaca  
tcaataacaacctattaatttcccctcgtcaaaaataaggttatcaagtgaataatcaccatgagtgacgactgaatccggtgagaatggcaaaagttatgcatttct  
ttccagactgttcaacagccagccattacgctcgtcatcaaaatcactcgcataccaaaccgttattcattcgtgattgcgcctgagcagacgaataacgc  
gatcgtctgtaaaaggacaattacaacaggaatcgaatgaaccggcgcaggaaactgccagcgcatacaaatattttcacctgaatcaggatattcttcta  
atacctggaatgctgttttccggggatcgcagtggtgagtaacctgcatcatcaggagtacggataaaatgcttgatggtcggaagaggcataaattccgtca  
gccagtttagtctgaccatctcatctgtaacatcattggcaacgctacctttgccatgttcagaacaactctggcgcacgggcttccatacaatcgaatgattgt  
cgcacctgattgcccacattatcgcgagccatttatacccatataaatcagcatccatgttggaatttaatcgggcctagagcaagacgttcccgttgaatat  
ggctcatATAAAGTGAAGCTACTGCCTTTAAGCTCGATTGGCGTGTTTGACAT
